# Supplementary material for: Adrenal GIPR expression and chromosome 19q13 microduplications in GIP-dependent Cushing’s syndrome
Source: JCI journal article supplement (doi:10.1172/jci.insight.92184), 2017-09-20
Supplement: sd1 [file 1]

## Supplemental Methods

### *Sequencing*

Genomic DNA was extracted from adrenal tissue samples manually using the high salt method. *ARMC5*, *PRKARIA* and *PRKACA* genes were sequenced by targeted next generation sequencing, using a set of primers designed using the AmpliSeq Designer (Life technologies) and amplifying 91 amplicons. The library was generated using the Ion AmpliSeq Library Kit 2.0 (Life Technologies). Emulsion PCR was performed using the Ion OneTouch™ Instrument (Life Technologies). Enrichment of the template-positive Ion OneTouch™ 200 ion sphere™ particles (ISPs, containing clonally amplified DNA) PCR was performed using the Ion OneTouch™ ES (Life Technologies), were loaded on Ion 316™ chips and sequenced with an Ion Personal Genome Machine® (PGM™) System (Life Technologies). Data collected on the PGM were collated and reanalysed using the Torrent Suite 4.2 using FASTQ files from the Ion Torrent Browser. Sequence alignment and extraction of SNPs and short insertions/deletions (indels) were performed using the Variant Caller plugin. Of the Torrent Suite and The NextGENe software v2.3.3 (Softgenetics, State College, Pennsylvania, USA). *CTNNB1* gene (exon 3) and *GNAS* gene (exon 7-9) was sequenced by conventional Sanger sequencing. Sequencing products were analyzed with an automated capillary sequencer (ABI PRISM 3730S Genetic Analyzer; Applied Biosystems, Foster City, CA).

### *Gene expression studies*

Gene expression analysis by RT-qPCR was performed in the 16 adrenal lesions, as well as in the adjacent non-tumorous adrenal tissue of patient #1, and 4 samples of unaffected adrenal tissue from 4 patients who underwent radical nephrectomy for renal cell carcinoma. Tissues were stored at –150° C until mRNA extraction with Trizol (Life Technologies, Saint Aubin, France) according to the manufacturer's recommendations. cDNA was obtained by reverse transcription of 1 µg of total RNA. Quantitative RT-PCR was performed using the Fast SYBR® Green Master Mix (Life Technologies) on a StepOnePlus™ Real-Time PCR system (Life Technologies).

Standard curves were generated by use of serial dilutions of linearized standard plasmids, spanning 6 orders of magnitude and yielding correlation coefficients larger than 0.98 and efficiencies of at least 0.95, in all experiments. The internal control gene for data normalization was  $\beta$ -*ACTIN*. The relative expression of each gene is expressed as the ratio of attomoles of the specific gene to attomoles of  $\beta$ -*ACTIN*. The primers for *ADRB1*, *AGTR1*, *AVPR1A*,  $\beta$ -*ACTIN*, *GIPR*, *GnRHR*, *HTR4*, *LHCGR*, *MC2R*, *QPCTL*, *SIX5*, *SNRPD2*, *FBXO46* and *ZMYND8* are shown in the Supplemental Table S4.

### ***Oligonucleotide based array-comparative genomic hybridization analysis (array-CGH)***

Genomic imbalances were analyzed by array-CGH using 400K oligonucleotide arrays (Agilent Technologies, Massy, France). DNA from adrenal samples was compared to blood donor genomic DNA. Hybridization was performed according to the manufacturer's protocol. Images were processed with Feature Extraction software (10.7.3.1) and data analysis was performed with Genomic Workbench V5.0.14 (Agilent Technologies). The genomic positions were determined using version 19 of the Human Genome (<http://genome.ucsc.edu/>). The ADM2 algorithm was used for statistical analysis. Copy number variations were considered significant if they were defined by four or more oligonucleotides and spanned at least 20 Kb (for 400K arrays, respectively) and were not identified in the Database of Genomic Variants (<http://projects.tcag.ca/cgi-bin/variation/gbrowse/hg19>).

### ***RNA FISH and DNA FISH***

For DNA FISH and for nascent transcript detection by RNA, the following BAC/Fosmid (CHORI) probes were used: *GIPR*/*QPCTL*/*FBXO46* locus (WI2-2971P5; only DNA FISH), *GIPR* (WI2-606G4; only RNA FISH) and *ZMYND8* (RP4-569M23). The correct chromosomal location of BACs was first verified by DNA FISH on metaphase spreads. Probes were labeled by nick translation (Vysis) with Spectrum Red-dUTP, Spectrum Green-dUTP, or Cy5- dUTP following the manufacturer's instructions. DNA and RNA FISH were performed as previously described <sup>1</sup>. Samples proper quality for RNA and DNA FISH experiment was done using known working BAC-based probes routinely used in the laboratory.

### ***Pyrosequencing***

For pyrosequencing, 600 ng of genomic DNA were converted by bisulfite (Zymo Research, USA). The GIPR promoter region was first amplified by PCR and then pyrosequenced using PyroMark Q96 (Qiagen, Germany). The primers for the PCR and the pyrosequencing are given in the Supplemental Figure S3.

### ***Mate-pair analysis and sequencing***

Libraries were prepared from selected adrenal lesion's DNA, using the Nextera Mate-pair Sample Preparation Kit (Illumina, CA). Libraries were sequenced on a HiSeq2500, each yielding around 90 million pairs of 100-nucleotide-long reads. Sequencing data were processed as previously described <sup>2</sup> and treated reads were mapped on version hg19 of the Human Genome with Bfast and BWA 0.7.0a. BAM preprocessing and detection of abnormally mapped pairs were performed using SVDetect <sup>3</sup>. A minimum of 5 abnormally mapped pairs in a cluster was set as a threshold to detect a structural variation. Bioinformatics analysis was performed at nebula.curie.fr <sup>4</sup> and replicated with the Galaxy instance of Bicêtre hospital.

### ***Plasmid constructs***

A 1 kb fragment of the intron 2 region of the human *ZMYND8* gene, in which *SacI* and *XhoI* restriction sites were introduced to facilitate cloning into the pGL4.26-Luciferase vector (Promega, Charbonnières-Les-Bains, France), was amplified by PCR from genomic DNA by using the High-Fidelity Phusion DNA polymerase (Life Technologies) and specific primers (Supplemental Table S1), yielding the *ZMYND8* intron 2-pGL4.26-Luc plasmid construct (Supplemental Figure S2A). Luciferase cDNA with the minimal promoter was then removed from the plasmid construct after *HindIII* and *FseI* digestion. In parallel, the *GIPR* coding sequence was isolated from the hGIPR plasmid after *HindIII* and *XhoI* digestion. Both fragments were incubated with the Klenow fragment of DNA Polymerase I (New England Biolabs, Evry, France) to fill in 5' overhangs and form blunt ends. *GIPR* cDNA was then inserted

downstream of the human *ZMYND8* intron 2 region to obtain the *ZMYND8* intron 2-GIPR plasmid construct (Supplemental Figure S2B).

### ***Luciferase reporter gene assays***

HEK 293T cells were seeded 72 h before transfection at 6,000 cells/well in 96-well plates in high glucose DMEM medium containing 2 mM glutamine, 100 IU/mL penicillin, 100 µg/mL streptomycin, and 10% fetal calf serum (Biowest) at 37°C. Cell culture reagents were from Life Technologies excepted when stated. Cells were then cotransfected in serum-free OptiMEM<sup>®</sup> medium using the Lipofectamine<sup>®</sup> 2000 reagent according to the manufacturer's recommendations (Life Technologies), together with the *ZMYND8* intron 2-pGL4.26-Luc plasmid construct (40 ng), the human glucocorticoid receptor (hGR, 40 ng), pcDNA3.1 (20 ng) and the pMIR-Report<sup>™</sup> β-gal control (35 ng) plasmids (Life Technologies), as an internal reporter plasmid control. Six hours after transfection, the culture medium was replaced by minimal medium containing 10% dextran charcoal-coated serum. The next day, cells were treated with 10<sup>-7</sup> M dexamethasone (DEX) in minimal medium and cotreated with a glucocorticoid antagonist RU486 (10<sup>-5</sup> M). Twenty-four hours later, cells were lysed in passive lysis buffer (Promega). Luciferase and β-galactosidase activities were expressed as a percentage of relative transcriptional activities compared with controls. The *ZMYND8* intron 2-GIPR plasmid construct (40 ng) was transfected, as described above, into HEK 293T cells, together with the hGR plasmid (40 ng), CRE-Luc (40 ng, Promega) and the pMIR-Report<sup>™</sup> β-gal (35 ng) control plasmids. The day after transfection, cells were pre-treated with 10<sup>-7</sup> M DEX in minimal medium in presence of 10<sup>-4</sup> M Ro 20-1724 (Sigma Aldrich), a phosphodiesterase inhibitor, to induce maximal GIPR expression. Twenty-four hours later, cells were treated for 4 h in serum-free medium with ethanol, 10<sup>-7</sup> M GIP, 10<sup>-5</sup> M H-89, 10<sup>-7</sup> M DEX or 10<sup>-5</sup> M RU486. Luciferase activity normalized to β-galactosidase activity was determined as described above.

H295R cells were seeded 72 h before transfection at 30,000 cells/well in 96-well plates in DMEM/Ham's F-12 medium supplemented with 2 mM glutamine, 100 IU/mL penicillin, 100 µg/mL streptomycin, 10%

dextran charcoal-coated serum, 20 mM HEPES, a mixture of insulin/transferrin/selenium. Eighteen hours before transfection, cells were treated with  $10^{-5}$  M metyrapone (Sigma-Aldrich), an inhibitor of the CYP11B1 enzyme. Cells were then cotransfected as described above with the *ZMYND8* intron 2-GIPR plasmid construct (100 ng), the hGR plasmid (100 ng), CRE-Luc (100 ng) and pRL-SV40 (Promega) (80 ng), as an internal reporter plasmid, in a serum-free OptiMEM<sup>®</sup> medium together with  $10^{-5}$  M metyrapone. Six hours after transfection, cells were pre-treated with  $10^{-7}$  M dexamethasone (DEX), DEX and  $10^{-5}$  M RU486, or ethanol in minimal medium containing  $10^{-5}$  M metyrapone and 10% dextran charcoal-coated serum. Twenty-four hours later, cells were treated for 4 h with ethanol,  $10^{-7}$  M GIP or  $10^{-5}$  M H-89 in serum-free medium containing  $10^{-4}$  M Ro 20-1724. Luciferase activities normalized to Renilla luciferase activities were expressed as a percentage of relative transcriptional activities compared with controls.

### ***Tissue incubation***

Fragments ( $\sim 50$  mm<sup>3</sup>) of adrenocortical adenoma from patient #1 were weighed ( $\sim 50$  mg) and transferred to 6-well plates containing 2 ml of incubation medium (DMEM supplemented with 1% antibiotic-antimycotic solution; Gibco, Saint-Aubin, France). Incubation experiments were conducted in triplicate for 4 h in incubation medium with or without GIP and in the presence or absence of H89 (Sigma-Aldrich, Saint-Quentin Fallavier, France) at 37°C with 5% CO<sub>2</sub>. Incubation media were immediately frozen until hormone assay. Cortisol concentration in the supernatant was determined by RIA.

### ***Immunohistochemistry***

Adenoma tissue sections were deparaffinated and rehydrated. Sections were treated with a peroxidase inhibitor (Dako Corporation, Trappes, France). Tissue slices were incubated with antibody specific to GIPR (LSA3840; Lifespan Biosciences; 1:50) for 30 min at 23°C, and then with a streptavidin-biotin-peroxidase complex (Dako). Enzyme activity was revealed with diaminobenzidine. The tissue sections were counterstained with hematoxylin.

## Supplemental Figure Legends

### Supplemental Figure S1 Hormonal findings and adenoma characterization in patient #1

**Panel A** shows 24-hour profiles of plasma cortisol concentrations on 3 consecutive days. The patient took 3 mixed meals each day. On the third day (red curve), plasma cortisol was assayed in the clinostatic position. Plasma corticotropin was always undetectable. **Panel B** shows plasma cortisol concentrations measured during fasting and after a meal taken at 8 p.m. **Panel C** shows plasma cortisol concentrations measured after meals, with and without prior subcutaneous administration of 100 µg octreotide. **Panel D** shows a computed tomograph of the adrenal glands, revealing a 44-mm hypodense mass in the right adrenal gland (yellow arrow) and atrophy of the left adrenal gland (white arrow). **Panel E** shows cortisol secretion by adrenocortical adenoma fragments, with and without GIP and in the presence and absence of the PKA inhibitor H89. Data are mean values of triplicate determinations. T bars indicate standard deviation. Three asterisks indicate  $P < 0.001$ . **Panel F** shows immunohistochemical staining of GIPR in the cytoplasm of adrenocortical adenoma cells. Nuclei (in blue) were stained with hematoxylin. Scale bars represent 50 µm.

### Supplemental Figure S2 Adrenal expression of aberrant receptors in adrenal lesions of patients with GIP-dependent Cushing's syndrome or aldosteronoma.

Expression profiles of *ADRB1* encoding beta-adrenergic receptor type 1, *AGTR1* encoding angiotensin 2 receptor type 1, *AVPR1a* encoding vasopressin receptor type 1, *GnRHR* encoding gonadotropin-releasing hormone receptor, *HTR4* encoding serotonin receptor type 4, *LHCGR* encoding luteinizing hormone–chorionic gonadotropin receptor and *MC2R* encoding adrenocorticotropin receptor in adrenal tissue samples obtained by RT-qPCR and normalized to the  $\beta$ -actin housekeeping gene. The results are expressed as relative expression compared to mean expression level in the unaffected adrenal tissue samples, arbitrary set at 1. Expression in adrenal lesions more than 10-fold of expression in normal

adrenal tissue was considered significant. Data represent the mean of two independent experiments, each of which was performed in triplicate. The T bars indicate the standard error of the mean.

**Supplemental Figure S3 Pyrosequencing of proximal *GIPR* promoter.**

**Panel A** shows the analyzed sequence of *GIPR* promoter (chr19: 46,171,165-46,171,452), containing 10 CpGs (underlined) and several *cis*-acting regulatory elements. Of note, 3 CpGs are located close to functional Sp1/Sp3 binding motifs (bolded). **Panel B** shows absence of methylation in the proximal *GIPR* promoter in the normal adrenal tissue, and in adrenocortical adenoma samples (pooled) and bilateral macronodular adrenal hyperplasia samples (pooled) of patients with aberrant adrenal sensitivity to GIP.

**Supplemental Figure S4 Global array-CGH profile of adrenal lesions of patients with GIP-dependent Cushing's syndrome or aldosteronoma.**

CNVs identified in 5 adenoma samples and 11 hyperplasia samples are shown separately. Genomic gains are in blue, deletions in red.

**Supplemental Figure S5 Expression of *SNRPD2*, *QPCTL*, *FBXO46* and *SIX5* genes in unaffected adrenals (control 1 and 2) and in 3 adrenal lesions with 19q13 duplication (from patients #1, #2 and #10).**

Expression profiles of these 4 genes in adrenal tissue samples were analyzed by RT-qPCR and normalized to the  $\beta$ -actin housekeeping gene. The results are expressed as relative expression compared to mean expression level in the unaffected adrenal tissue samples, arbitrary set at 1. Data represent the mean of one representative experiment performed in triplicate. The T bars indicate the standard error of the mean. Only expression in adrenal lesions more than 10-fold of expression in normal adrenal tissue was considered significant. Note that transcript levels of these 4 genes were very low in these samples (both in normal adrenal tissue and in adrenal lesions). I.e. in the lesion of the patient #10: *QPCTL* 3.1 +/- 0.9 molecules per  $\mu$ g of RNA, *FBXO46* 9.7 +/- 2.8 molecules per  $\mu$ g of RNA, *SIX5* 227 +/- 9.8 molecules per  $\mu$ g of

RNA and *SNRPD2* 168 +/- 38.4 molecules per µg of RNA. The modest and inconsistent differences in *SNRPD2*, *QPCTL*, *FBXO46* and *SIX5* expression in the 3 adrenal lesions with 19q10 duplication are in striking contrast with undisputable GIPR overexpression in these adrenal lesions: 574-fold in the adenoma of patient #1, 660-fold in the adenoma of patient #2 and 558-fold the hyperplasia of patient #10, as compared to normal adrenal tissue (Figure 1A).

**Supplemental Figure S6 Structure of the *ZMYND8* intron 2-pGL4.26-Luc and *ZMYND8* intron 2-GIPR plasmid constructs used for luciferase assays.**

The GRE sequence is indicated in red.



## References

1. Chaumeil J, Augui S, Chow JC, Heard E. Combined immunofluorescence, RNA fluorescent in situ hybridization, and DNA fluorescent in situ hybridization to study chromatin changes, transcriptional activity, nuclear organization, and X-chromosome inactivation. *Methods Mol Biol* 2008;463:297-308.
2. Leggett RM, Clavijo BJ, Clissold L, Clark MD, Caccamo M. NextClip: an analysis and read preparation tool for Nextera Long Mate Pair libraries. *Bioinformatics* 2014;30:566-8.
3. Zeitouni B, Boeva V, Janoueix-Lerosey I, et al. SVDetect: a tool to identify genomic structural variations from paired-end and mate-pair sequencing data. *Bioinformatics* 2010;26:1895-6.
4. Boeva V, Lermine A, Barette C, Guillouf C, Barillot E. Nebula--a web-server for advanced ChIP-seq data analysis. *Bioinformatics* 2012;28:2517-9.

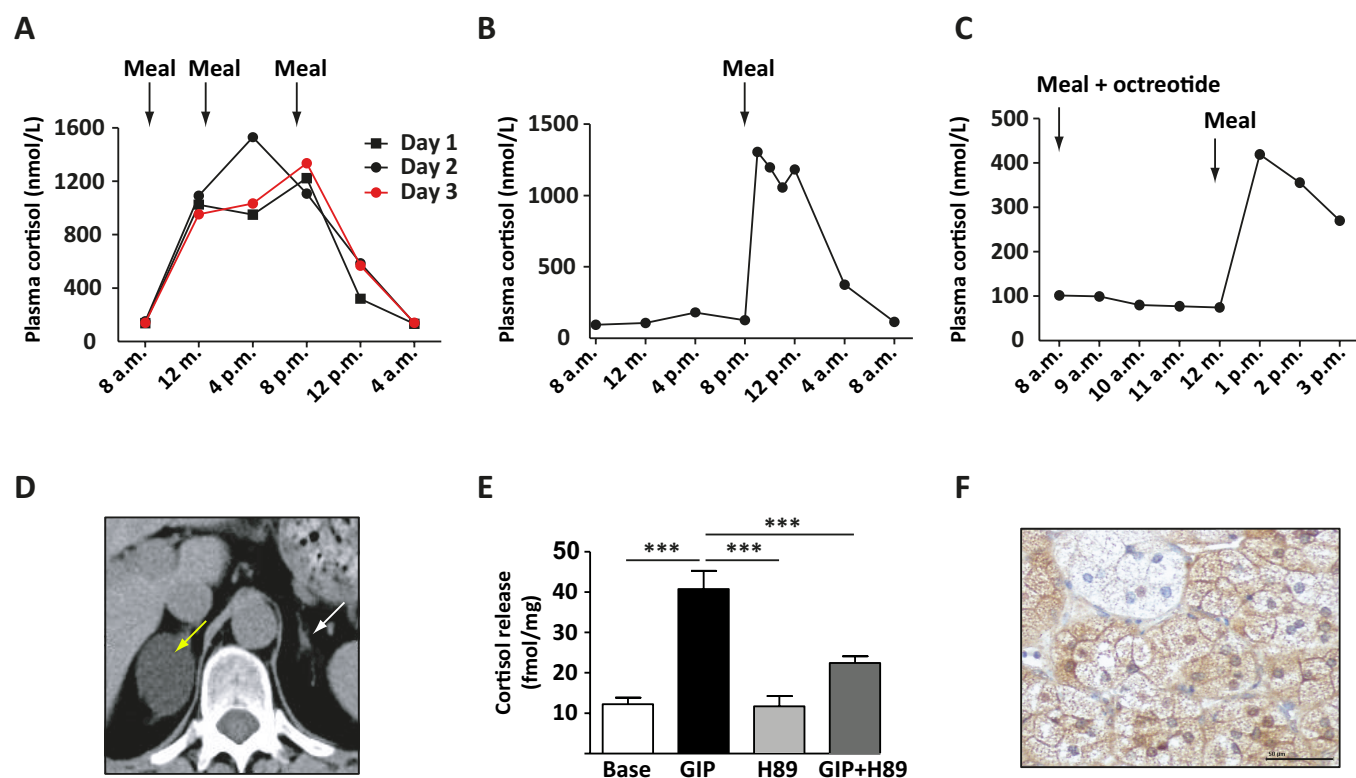

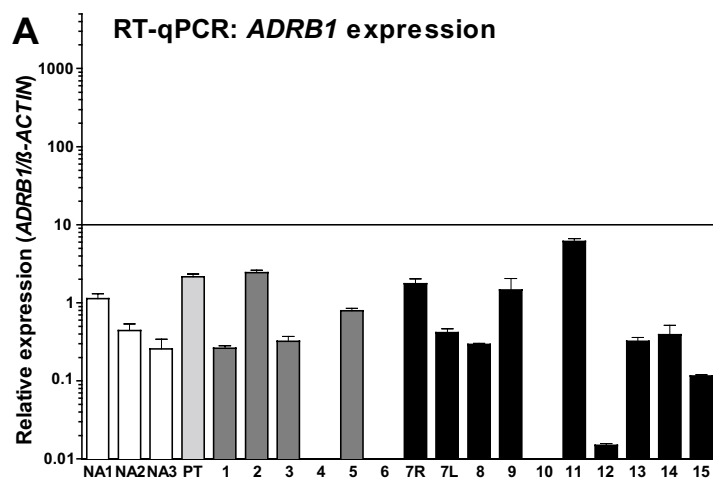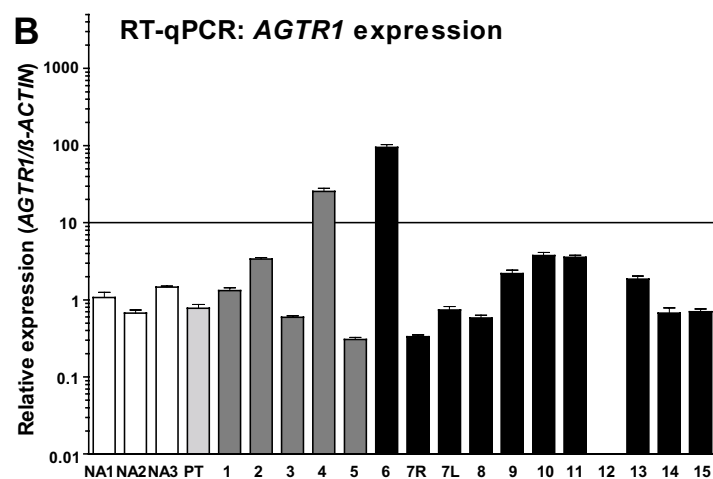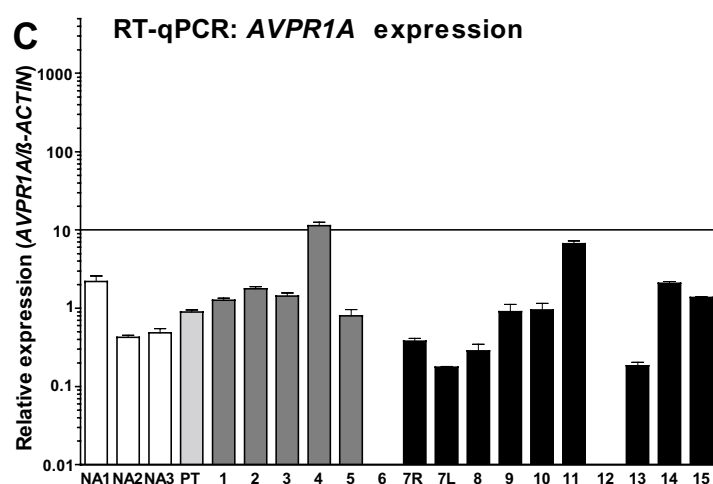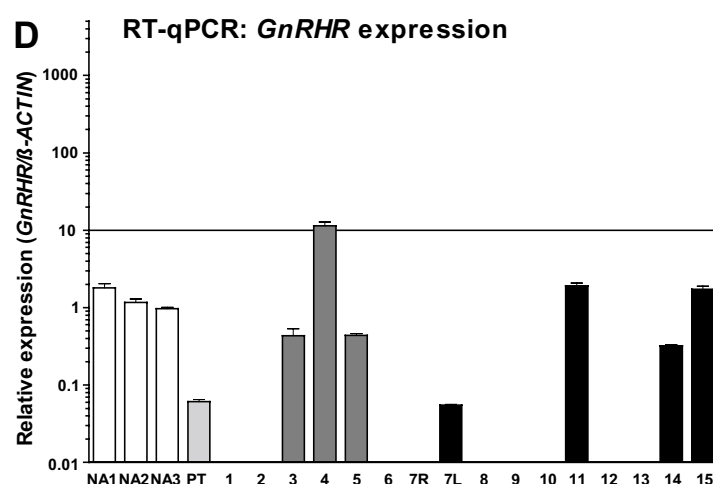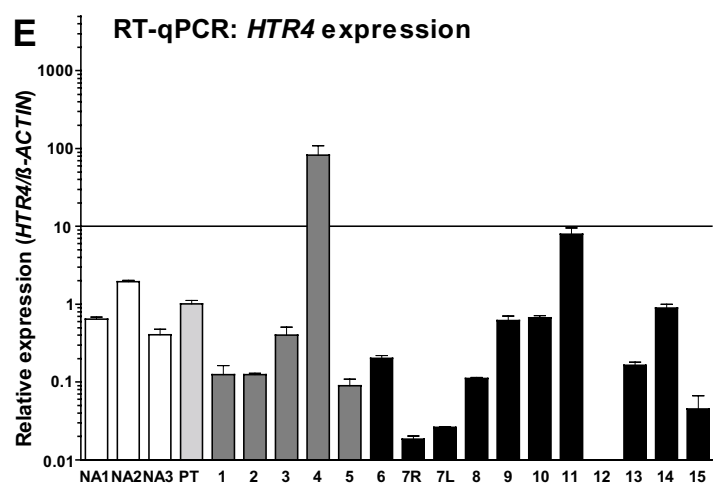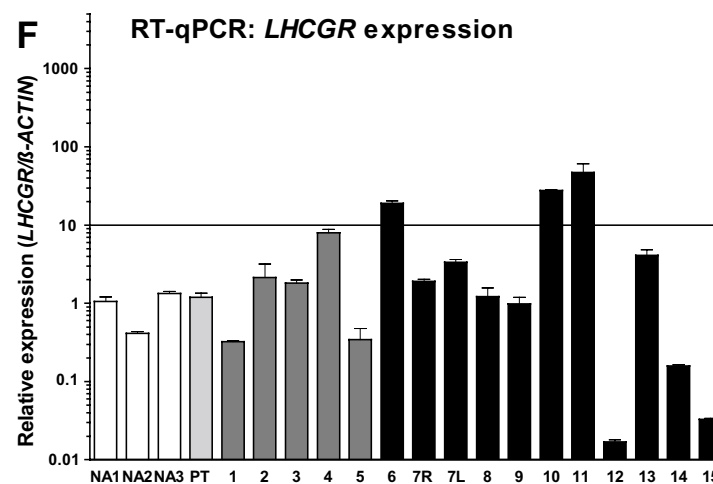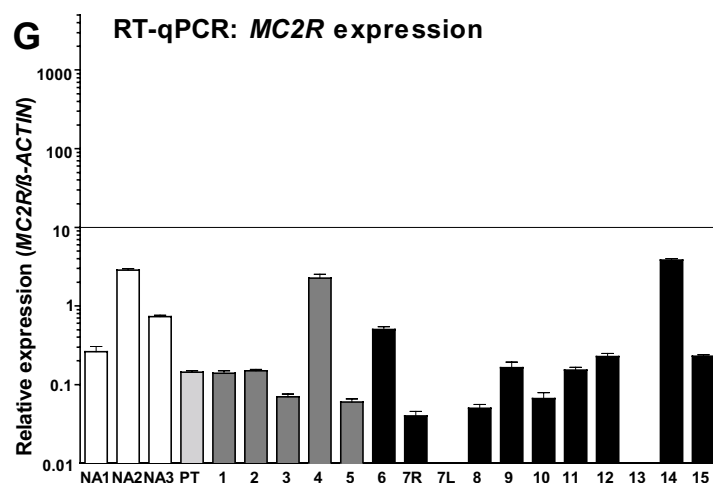

□ Normal adrenal tissue  
 ◻ Peri-tumoral adrenal tissue  
 ◻ Adrenocortical adenoma  
 ■ Bilateral macronodular adrenal hyperplasia

Supplemental Figure S2

A

TATTTGTGGGTGGGATAGTATGAGAGATTGTATATATTTGGTGTAGGGGTTTTTAGGACGATAAGGATAATTTAGTA  
ATTGTTTTTTTTTATGATTTTGATGATTGTTTTTTGTTTCGGTTTTTTGTTTTAGAGTTTTTTCGTTTTCGTTTTTTGT  
TTCGTTTGGTTTCGTTTTTTTTTATTATTTTCGGGTTGTTAGCGTTTGTTATTTTTTTTTTAGAGTCGAGATAAGGTAG  
TTGGAGGTAGCGGTGGTAGGGGTTGTAGGAGTAAGTGATTAGGAGTAGGATTGGGG

B

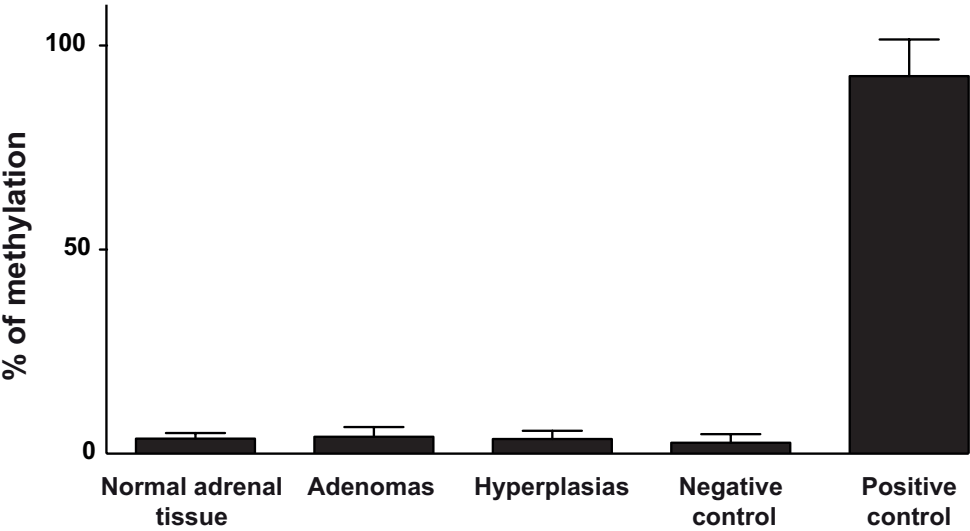

Adrenocortical adenomas

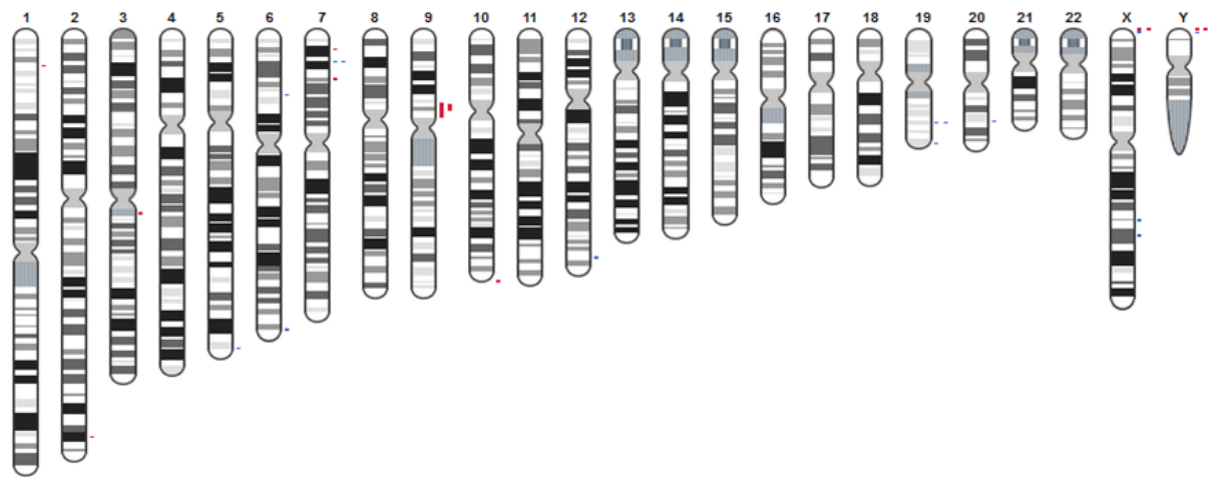

Bilateral macronodular adrenal hyperplasias

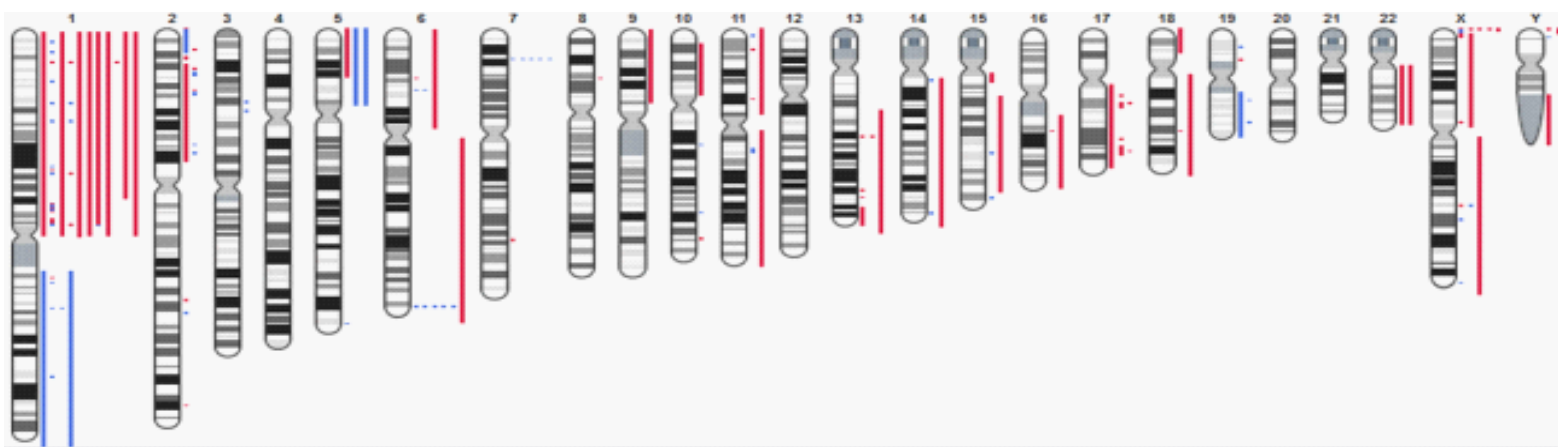

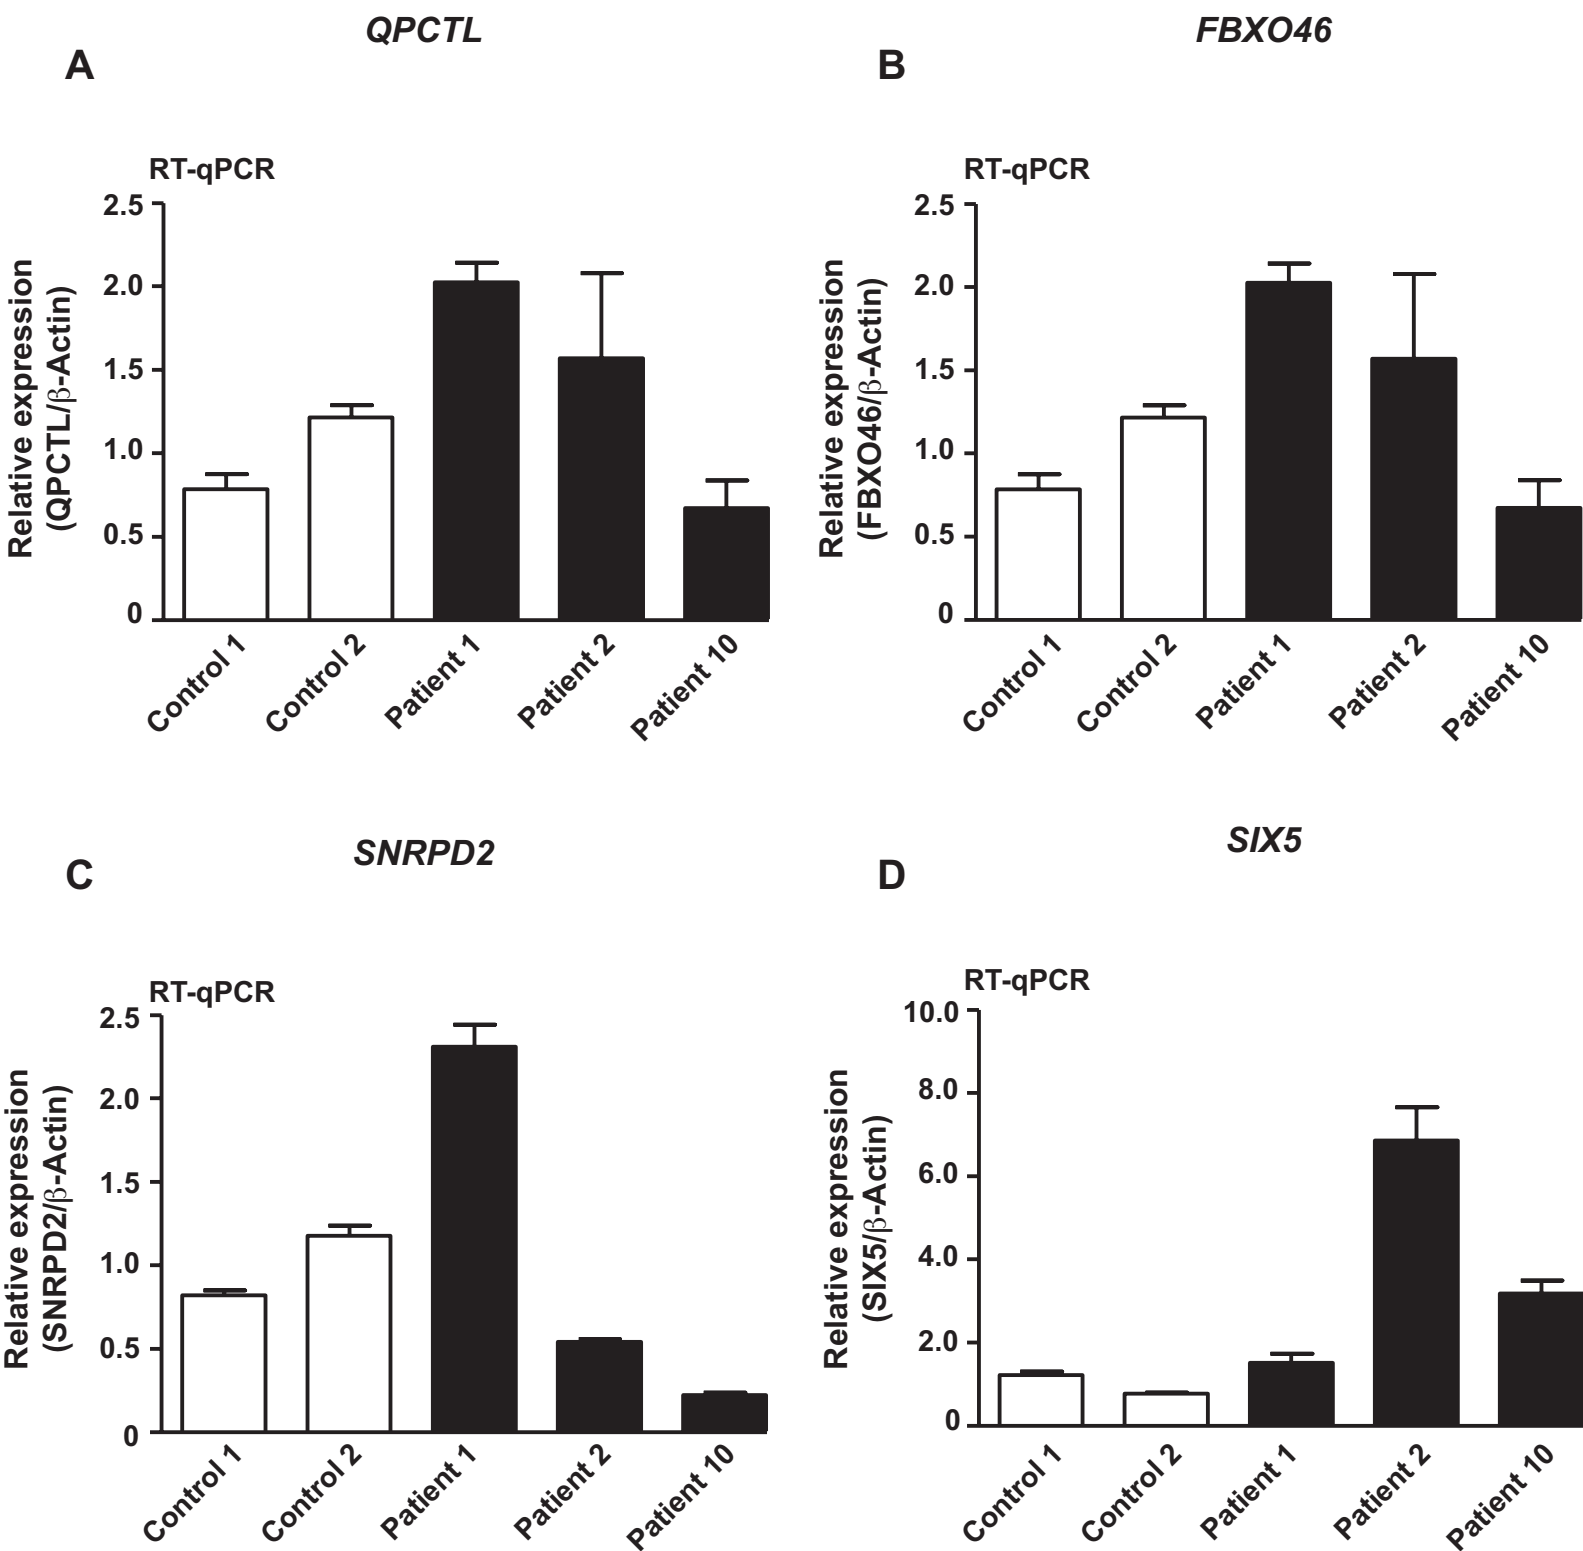

Supplemental Figure 5

AGCTTTGATTTCTCTGGCTCAAGCAGTCCTCCCCTGAGCCTCCCGAGTAGCTGGGACTACAGGTGTGCACTACC  
ACCCCTGGCTAATGTTTATATTTTTTTGTAGAGATGAGGTTTCACTATGTTGCCAGGCTGGTCTTGAACCTCCTG  
GGCTCAAGCGATCCTCCTGTCTTGGCCTCCCAAAGTGCTGGGATTGCTGGTGTGAGCCACCACTCCTGGGCCCA  
TTCTCCATTTAAAGTGAATAGTTTGATGGTTTTTAATATATTTTCACGGAGACCGGGTGTGGTGGCTGACGCCTG  
TAATCCCAGCACTTTGGGAGGCCGAGGCGGGTGGATCACCTGAGGTCAGGAGTTCCGACCAGCCTGGCCAACATG  
GTGAAACCCTGTCTCCACTAAAAATACAAAAAATTAGCTGAGTGTGGTGGCGTGTGCCTGTAATCCCAGCTACTC  
AGCAGGCTGAGGCGGGAGAATTGCTTGAACGTGGGACGTGGAGGTTGCAGTGAGCCAAGATCGTGCCACTGTACT  
CCAGCCCGGGTGACAGAGCAAGACTGCCTAAAATATATATATATATATATATATATATATATATTTTTTTTTTTTTCACAGAGTTGT  
GCAGCCAACAGCACAAATCAGTTGTAGATTTTCATCACCCCCAATAAGAACTTCATACTCATTAGCAGTCACTTC  
CCATTCCCCCGTTACCCCTGTGCCTGGCAAGTACCAGTCTACTTTTCTGTGCCTGTGGATTTGCTTATGCTAGACA  
TTTCATATAAATGGAATCATACAGTATGTGACCTTTTGGTCTGAGTTCGTTCACTTAGAATAATGTTTTCAAGGC  
TCATCCACATTCTTGTAGCATAGATCATCAGTACAGACAGTTCCTGACTTATAGTGGTGCGGAAGTGACAGTTCA  
GTACAAACAGTACTTGGCATTTTGGATTTTTTGATCTTTTCTCTGGCTAGCATCAGTATGAGACTCTCTTGGGGTG  
CCAGGCACCTCCCAGTCAGCCACATGATCAC

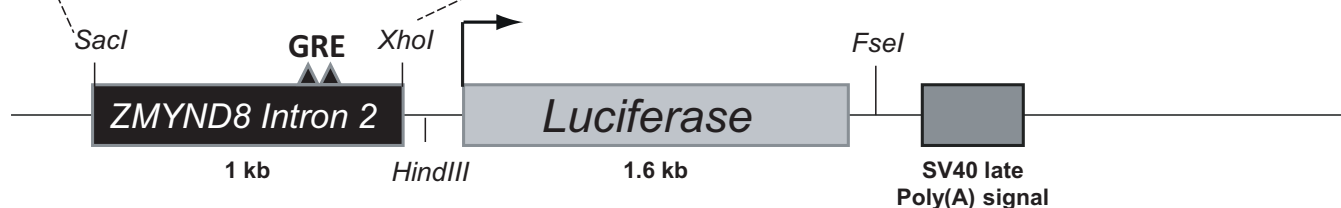

*SacI* GRE *XhoI*

**ZMYND8 Intron 2** 1 kb

*human GIPR* 3.2 kb

SV40 late Poly(A) signal

## Supplemental Figure S6

**Supplemental Table S1 Summary of CNVs detected by array-CGH in adrenal lesions of patients with GIP-dependent Cushing's syndrome or aldosteronoma.**

| Patient | Sample                     | CNV Nb | Size (min-max. kb) | Loss Nb | Gain Nb |
|---------|----------------------------|--------|--------------------|---------|---------|
| 1       | Adenoma                    | 4      | 67.44-100.44       | 1       | 3       |
| 2       | Adenoma                    | 2      | 191.91-338.88      | 0       | 2       |
| 3       | Adenoma                    | 6      | 10.34-404.09       | 3       | 3       |
| 4       | Adenoma                    | 8      | 9.21-8.457.29      | 6       | 2       |
| 5       | Adenoma                    | 6      | 12.89-4.587.30     | 2       | 4       |
| 6       | Hyperplasia                | 26     | 10.84-120.591.17   | 13      | 13      |
| 7       | Hyperplasia, right adrenal | 9      | 10.84-120.604.32   | 4       | 5       |
|         | Hyperplasia, left adrenal  | 7      | 15.16-120.549.37   | 2       | 5       |
| 8       | Hyperplasia                | 11     | 9.21-120.591.17    | 4       | 7       |
| 9       | Hyperplasia                | 15     | 115.21-113.736.79  | 14      | 1       |
| 10      | Hyperplasia                | 11     | 8.16-120.591.17    | 5       | 6       |
| 11      | Hyperplasia                | 25     | 2.7-639.86         | 2       | 23      |
| 12      | Hyperplasia                | 3      | 481.55-98.813.47   | 3       | 0       |
| 13      | Hyperplasia                | 1      | 120.575.77         | 1       | 0       |
| 14      | Hyperplasia                | 1      | 30.80              | 0       | 1       |
| 15      | Hyperplasia                | 15     | 287.33-108.907.18  | 13      | 2       |

The number of CNVs varied from 1 to 26 per sample. In adrenocortical adenomas very few CNVs were detected, located mostly on instable regions of the genome. In contrast, primary bilateral macronodular adrenal hyperplasias showed a higher number of extensive chromosomal imbalances.



**Supplemental Table S2 Detailed description of CNVs detected by array-CGH in adrenal lesions of patients with GIP-dependent Cushing's syndrome or aldosteronoma.**

| Patient | Sample      | Gains              |                         | Losses             |                         | Size (kb)  |
|---------|-------------|--------------------|-------------------------|--------------------|-------------------------|------------|
|         |             | Chromosomal region | start-stop (hg19)       | Chromosomal region | start-stop (hg19)       |            |
| 1       | Adenoma     |                    |                         | 7p21.3             | 8.693.710-8.764.517     | 70.81      |
|         |             | 12q24.31           | 123.969.506-124.043.818 |                    |                         | 74.31      |
|         |             | 19q13.32           | 46.167.704-46.268.140   |                    |                         | 100.44     |
|         |             | 20q13.12           | 45.952.305-46.019.749   |                    |                         | 67.44      |
| 2       | Adenoma     | 19q13.32           | 46.149.049-46.340.961   |                    |                         | 191.91     |
|         |             | 19q13.43           | 57.483.767-57.822.649   |                    |                         | 338.88     |
| 3       | Adenoma     | 5q35.2             | 176.041.560-176.051.896 |                    |                         | 10.34      |
|         |             | 6p21.31            | 35.203.234-35.227.959   |                    |                         | 24.73      |
|         |             | 7p21.2             | 16.240.510-16.255.671   |                    |                         | 15.16      |
|         |             |                    |                         | 10q26.3            | 134.391.564-134.795.657 | 404.09     |
|         |             |                    |                         | Xp22.33            | 81.548-92.387           | 10.84      |
|         |             |                    |                         | Yp11.32            | 31.548-42.387           | 10.84      |
|         |             |                    |                         |                    |                         |            |
| 4       | Adenoma     |                    |                         | 1p36.13            | 17.594.882-17.621.864   | 26.98      |
|         |             |                    |                         | 3q11.2             | 96.287.058-96.316.860   | 29.80      |
|         |             |                    |                         | 7p15.2             | 26.137.319-26.175.778   | 38.46      |
|         |             |                    |                         | 9p13.1p11.2        | 38.755.124-47.212.417   | 8.457.29   |
|         |             |                    |                         | Xp22.33            | 81.548-92.387           | 10.84      |
|         |             | Xq22.2             | 102.816.308-102.825.521 |                    |                         | 9.21       |
|         |             | Xq23               | 111.711.991-111.734.734 |                    |                         | 22.74      |
|         |             |                    |                         | Yp11.32            | 31.548-42.387           | 10.84      |
| 5       | Adenoma     |                    |                         | 2q36.3             | 228.243.887-228.256.777 | 12.89      |
|         |             | 6q26               | 163.920.296-163.942.106 |                    |                         | 21.81      |
|         |             | 7p21.2             | 16.240.510-16.255.671   |                    |                         | 15.16      |
|         |             |                    |                         | 9p13.1p11.2        | 39.072.211-43.659.512   | 4.587.30   |
|         |             | Xp22.33            | 880.956-943.314         |                    |                         | 62.36      |
|         |             | Yp11.32            | 830.956-893.314         |                    |                         | 62.36      |
| 6       | Hyperplasia |                    |                         | 1p36.33p11.2       | 759.762-121.350.930     | 120.591.17 |
|         |             | 1p32.3             | 55.054.621-55.199.256   |                    |                         | 144.64     |
|         |             |                    |                         | 1q21.2             | 149.041.933-149.581.094 | 539.16     |
|         |             | 1q21.3             | 152.556.449-152.586.281 |                    |                         | 29.83      |
|         |             | 1q24.2             | 169.216.643-169.241.333 |                    |                         | 24.69      |
|         |             |                    |                         | 2p25.3             | 17.019-84.728           | 67.71      |
|         |             | 2p25.3p24.3        | 469.914-15.051.058      |                    |                         | 14.581.14  |
|         |             |                    |                         | 2p25.1             | 11.426.657-11.938.779   | 512.12     |
|         |             |                    |                         | 2p24.3             | 15.893.132-16.375.214   | 482.08     |
|         |             |                    |                         | 2p24.2             | 16.952.523-17.055.306   | 102.78     |
|         |             |                    |                         | 2p24.1p12          | 19.924.907-78.633.918   | 58.709.01  |
|         |             | 2p23.3             | 25.045.201-25.122.236   |                    |                         | 77.04      |
|         |             | 2p23.3p23.2        | 26.472.591-28.476.960   |                    |                         | 2.004.37   |
|         |             |                    |                         | 2p22.3             | 35.967.990-35.990.844   | 22.85      |
|         |             | 2p22.2             | 37.958.541-38.002.391   |                    |                         | 43.85      |
|         |             | 2p13.3             | 70.866.336-70.992.030   |                    |                         | 125.69     |
|         |             | 2p12               | 76.351.666-76.437.349   |                    |                         | 85.68      |
|         |             |                    |                         | 2q36.3             | 228.243.887-228.256.777 | 12.89      |
|         |             | 6q26               | 163.920.296-163.950.870 | 5p15.33p13.3       | 26.142-29.160.570       | 29.134.43  |
|         |             | 7p21.2             | 16.240.510-16.255.671   |                    |                         | 30.57      |
|         |             | 10q24.33           | 105.191.824-105.222.032 |                    |                         | 15.16      |
|         |             |                    |                         |                    |                         | 30.21      |
|         |             |                    |                         | 17q11.1q25.2       | 25.375.449-75.163.576   | 49.788.13  |
|         |             |                    |                         | 22q11.1q13.33      | 16.133.474-51.170.223   | 35.036.75  |

|    |                            |                                                     |                                                                                                                                 |                                                                                                                                                                                       |                                                                                                                                                                                                                                                                                                                                                                       |                                                                                                                                                                      |
|----|----------------------------|-----------------------------------------------------|---------------------------------------------------------------------------------------------------------------------------------|---------------------------------------------------------------------------------------------------------------------------------------------------------------------------------------|-----------------------------------------------------------------------------------------------------------------------------------------------------------------------------------------------------------------------------------------------------------------------------------------------------------------------------------------------------------------------|----------------------------------------------------------------------------------------------------------------------------------------------------------------------|
|    |                            | Xp22.33                                             | 928.806-940.732                                                                                                                 | Xp22.33                                                                                                                                                                               | 81.548-92.387                                                                                                                                                                                                                                                                                                                                                         | 10.84<br>11.93                                                                                                                                                       |
| 7  | Hyperplasia, right adrenal | 1p31.1<br>1p22.3<br>5p15.33p11<br>6q26<br>7p21.2    | 83.616.238-83.866.100<br>88.079.298-88.127.475<br>42.109-46.115.086<br>163.920.296-163.942.106<br>16.240.510-16.255.671         | 1p36.33p11.2<br><br><br><br><br>13q21.1<br>Xp22.33<br>Yp11.32                                                                                                                         | 746.608-121.350.930<br><br><br><br><br>58.157.668-58.194.488<br>81.548-92.387<br>31.548-42.387                                                                                                                                                                                                                                                                        | 120.604.32<br>249.86<br>48.18<br>46.072.98<br>21.81<br>15.16<br>36.82<br>10.84<br>10.84                                                                              |
|    | Hyperplasia, left adrenal  | 1p12p11.2<br>1q21.1q44<br>3p21.31<br>6q26<br>7p21.2 | 120.529.670-120.903.682<br>145.264.630-249.212.668<br>47.234.542-47.257.077<br>163.920.296-163.950.870<br>16.240.510-16.255.671 | 1p36.33p11.2<br><br><br><br><br>13q21.1                                                                                                                                               | 801.556-121.350.930<br><br><br><br><br>58.157.668-58.194.488                                                                                                                                                                                                                                                                                                          | 120.549.37<br>374.01<br>103.948.04<br>22.54<br>30.57<br>15.16<br>36.82                                                                                               |
| 8  | Hyperplasia                | 1p35.3<br>1p34.2<br>5p15.33p11<br>6p21.31           | 29.641.035-29.653.134<br>43.731.986-43.748.554<br>42.109-46.115.086<br>35.203.234-35.227.959                                    | 1p36.33p11.2<br><br><br><br>8p21.2<br>16q11.2q24.3<br>Xp22.33                                                                                                                         | 759.762-121.350.930<br><br><br><br>27.319.797-27.349.027<br>46.587.892-90.118.285<br>81.548-92.387                                                                                                                                                                                                                                                                    | 120.591.17<br>12.10<br>16.57<br>46.072.98<br>24.73<br>29.23<br>43.530.39<br>10.84<br>9.93<br>9.21<br>22.74                                                           |
| 9  | Hyperplasia                | 1p13.3                                              | 107.755.754-108.164.476                                                                                                         | 1p36.33p13.2<br><br>1p13.3<br>1p13.3p13.2<br>1p13.1<br>1p12<br>2q24.2<br>6p22.1<br>9p24.3p11.2<br>10p15.1p11.1<br>10q26.11q26.12<br>13q14.11q34<br>15q13.3q26.1<br>18q21.2<br>Xp11.21 | 746.608-114.483.398<br><br>108.926.313-109.247.547<br>111.535.290-112.366.718<br>116.919.588-117.034.794<br>118.158.972-120.176.982<br>162.770.039-163.144.683<br>27.526.618-28.297.558<br>220.253-43.836.428<br>6.578.408-38.134.373<br>121.199.229-121.983.218<br>42.259.224-115.105.297<br>33.009.424-90.345.391<br>51.431.756-51.715.252<br>56.992.484-57.704.961 | 113.736.79<br>408.72<br>321.23<br>831.43<br>115.21<br>2.018.01<br>374.64<br>770.94<br>43.616.18<br>31.555.97<br>783.99<br>72.846.07<br>57.335.97<br>283.50<br>712.48 |
| 10 | Hyperplasia                | 1p32.3<br>1p12p11.2<br>1q21.1q44<br>7p21.2          | 55.085.200-55.093.357<br>120.529.670-120.614.056<br>145.264.630-249.212.668<br>16.240.510-16.255.671                            | 1p36.33p11.2<br><br><br><br>7q31.32<br>11p12<br><br>16q12.2<br><br>Xq22.2                                                                                                             | 759.762-121.350.930<br><br><br><br>123.772.959-123.786.416<br>40.041.124-40.107.104<br><br>55.799.203-55.822.392<br><br>102.816.308-102.825.521                                                                                                                                                                                                                       | 120.591.17<br>8.16<br>84.39<br>103.948.04<br>15.16<br>13.46<br>65.98<br>24.92<br>23.19<br>27.129.44<br>9.21                                                          |
| 11 | Hyperplasia                | 1p36.32<br>1p36.22<br>1p34.2                        | 3.832.693-3.844.918<br>9.904.660-9.975.048<br>43.731.986-43.748.554                                                             |                                                                                                                                                                                       |                                                                                                                                                                                                                                                                                                                                                                       | 12.23<br>70.39<br>16.57                                                                                                                                              |

|    |             |          |                         |                 |                        |            |
|----|-------------|----------|-------------------------|-----------------|------------------------|------------|
|    |             | 1p13.3   | 110.281.079-110.314.306 |                 |                        | 33.23      |
|    |             | 2q31.1   | 169.907.405-169.918.656 |                 |                        | 11.25      |
|    |             | 3p22.1   | 41.879.402-41.894.198   |                 |                        | 14.80      |
|    |             | 5q35.2   | 176.041.560-176.051.896 |                 |                        | 10.34      |
|    |             | 6p21.31  | 35.203.234-35.227.959   |                 |                        | 24.73      |
|    |             | 6q26     | 163.920.296-163.942.106 |                 |                        | 21.81      |
|    |             | 7p21.2   | 16.240.510-16.255.671   |                 |                        | 15.16      |
|    |             | 10q21.2  | 61.320.179-61.362.005   |                 |                        | 41.83      |
|    |             | 11p15.5  | 1.743.904-2.383.763     |                 |                        | 639.86     |
|    |             | 11q13.1  | 64.107.266-64.208.595   |                 |                        | 101.33     |
|    |             | 11q13.2  | 66.093.417-66.108.523   |                 |                        | 15.11      |
|    |             | 14q11.2  | 20.732.596-20.760.405   |                 |                        | 27.81      |
|    |             | 14q32.32 | 103.528.110-103.586.240 |                 |                        | 58.13      |
|    |             | 15q23    | 68.065.053-68.113.794   |                 |                        | 48.74      |
|    |             | 19p13.2  | 11.296.314-11.321.918   |                 |                        | 25.60      |
|    |             |          |                         | 19p13.11        | 19.351.556-19.612.665  | 261.11     |
|    |             | 19q13.12 | 36.357.708-36.370.533   |                 |                        | 12.83      |
|    |             | 19q13.33 | 50.973.797-51.387.349   |                 |                        | 413.55     |
|    |             |          |                         | Xp22.33         | 81.548-92.387          | 10.84      |
|    |             | Xp22.33  | 556.373-561.307         |                 |                        | 4.93       |
|    |             | Xp22.33  | 578.537-590.689         |                 |                        | 12.15      |
|    |             | Xq28     | 151.119.742-151.122.438 |                 |                        | 2.70       |
| 12 | Hyperplasia |          |                         | 1p36.33p21.3    | 746.608-99.560.081     | 98.813.47  |
|    |             |          |                         | 11p15.4         | 9.181.761-9.663.311    | 481.55     |
|    |             |          |                         | 15q11.1q12      | 20.102.541-26.309.444  | 6.206.90   |
| 13 | Hyperplasia |          |                         | 1p36.33 - p11.2 | 746.608-121.322.377    | 120.575.77 |
| 14 | Hyperplasia | 6q26     | 163.911.310-163.942.106 |                 |                        | 30.80      |
| 15 | Hyperplasia | 2p22.1   | 39.270.599-39.622.894   |                 |                        | 352.30     |
|    |             |          |                         | 6p25.3p11.2     | 389.423-58.686.125     | 58.296.70  |
|    |             |          |                         | 6q11.1q27       | 61.982.931-170.890.108 | 108.907.18 |
|    |             |          |                         | 11p15.5p11.12   | 210.300-51.511.461     | 51.301.16  |
|    |             |          |                         | 11q11q25        | 55.028.487-134.927.114 | 79.898.63  |
|    |             |          |                         | 14q11.2q32.33   | 19.376.762-107.278.770 | 87.902.01  |
|    |             |          |                         | 18p11.32p11.21  | 118.760-14.966.054     | 14.847.29  |
|    |             |          |                         | 18q11.1q23      | 18.529.851-78.010.032  | 59.480.18  |
|    |             |          |                         | 22q11.1q13.33   | 16.133.474-51.178.264  | 35.044.79  |
|    |             |          |                         | Xp22.33         | 61.091-2.052.995       | 1.991.90   |
|    |             |          |                         | Xp22.33p11.21   | 2.373.908-58.051.765   | 55.677.86  |
|    |             |          |                         | Xq11.1q28       | 61.931.689-155.190.083 | 93.258.39  |
|    |             |          |                         | Yp11.32p11.2    | 11.091-3.714.007       | 3.702.92   |
|    |             | Yp11.32  | 2.016.581-2.303.907     |                 |                        | 287.33     |
|    |             |          |                         | Yq11.23q12      | 28.754.210-59.310.245  | 30.556.04  |

**Supplemental Table S3 Recurrent CNVs detected by array-CGH in adrenal lesions of patients with GIP-dependent Cushing's syndrome or aldosteronoma.**

| Adrenal histology     | Patient No       | Chromosomal region (start-stop. hg19) | Size (kb) | CNV type |
|-----------------------|------------------|---------------------------------------|-----------|----------|
| Hyperplasia           | 6,7,8,9,10,12,13 | chr1:801.556-99.560.081               | 98.813.53 | loss     |
| Hyperplasia           | 8,11             | chr1:43.731.986-43.748.554            | 16.57     | gain     |
| Hyperplasia           | 6,10             | chr1:55.085.200-55.093.357            | 8.16      | gain     |
| Hyperplasia           | 6,7,8,10,13      | chr1:116.919.588-117.034.794          | 115.21    | loss     |
| Hyperplasia           | 6,7,8,10,13      | chr1:118.158.972-120.176.982          | 2.018.01  | loss     |
| Hyperplasia           | 7,8              | chr5:42.109-46.115.086                | 46.073.98 | gain     |
| Hyperplasia           | 9,15             | chr6:27.526.618-28.297.558            | 770.94    | loss     |
| Hyperplasia           | 8,11             | chr6:35.203.234-35.227.959            | 24.73     | gain     |
| Hyperplasia           | 6,7,11,14        | chr6:163.920.296-163.942.106          | 21.81     | gain     |
| Adenoma / Hyperplasia | 3,5,6,7,10,11    | chr7:16.240.510-16.255.671            | 15.16     | gain     |
| Adenoma               | 4,5              | chr9:39.072.211-43.659.512            | 4.587.30  | loss     |
| Hyperplasia           | 12,15            | chr11:9.181.761-9.663.311             | 481.55    | loss     |
| Hyperplasia           | 10,15            | chr11:40.041.124-40.107.104           | 65.98     | loss     |
| Hyperplasia           | 7,9              | chr13:58.157.668- 58.194.488          | 36.82     | loss     |
| Hyperplasia           | 8,10             | chr16:55.799.203-55.822.392           | 23.2      | loss     |
| Hyperplasia           | 9,15             | chr18:51.431.756-51.715.252           | 283.50    | loss     |
| Adenoma               | 1,2              | chr19:46.167.704-46.268.140           | 100.44    | gain     |
| Hyperplasia           | 6,15             | chr22:16.133.474- 51.170.223          | 35.036.75 | loss     |
| Adenoma / Hyperplasia | 3,4,6,7,8,11,15  | chrX:81.548-92.387                    | 10.84     | loss     |
| Hyperplasia           | 10,15            | chrX:102.816.308-102.825.521          | 9.21      | loss     |
| Adenoma / Hyperplasia | 3,4,7,15         | chrY:31.548-42.387                    | 10.84     | loss     |

A total of 16 recurrent DNA variations in primary bilateral macronodular adrenal hyperplasias, 2 recurrent DNA variations in adrenocortical adenomas and 3 recurrent DNA variations common to both adenomas and hyperplasias were detected.

**Table S4 Primer sequences used for quantitative RT-PCR, genomic PCR, pyrosequencing and the GIPR antibody used for immunohistochemistry.**

***Primer sequences used for the cloning of ZMYND8 intron 2***

| <i>Name</i>     | <i>Sense primer</i>                | <i>Antisense primer</i>               |
|-----------------|------------------------------------|---------------------------------------|
| ZMYND8 intron 2 | 5'-GCGTGAGCTCAGCTTTGATTCTGGCTCA-3' | 5'-CGCCCTCGAGCGTGATCATGTGGCTGACTGG-3' |

***Primer sequences used for quantitative RT-qPCR***

| <i>Name</i>    | <i>Accession number</i> | <i>Amplicon size (bp)</i> | <i>Sense primer</i>            | <i>Antisense primer</i>          |
|----------------|-------------------------|---------------------------|--------------------------------|----------------------------------|
| ADRB1          | NM_000684.2             | 79                        | 5'-GCCCAACATCTCGTCTGAA-3'      | 5'-CCCTCCCAAACCTTCCTTTT-3'       |
| AGTR1          | NM_000685.4             | 99                        | 5'-GCTTCAGCCAGCGTCAGTTT-3'     | 5'-GGGACTTCATTGGGTGAACAA-3'      |
| AVPR1A         | NM_000706.4             | 80                        | 5'-CTTCCCGTCGCAACATAGG-3'      | 5'-CGCTCGTGACTTAAAGAGCTATCTC-3'  |
| $\beta$ -ACTIN | NM_001101.3             | 150                       | 5'-GCATGGGTGAGAAGGATTCCT-3'    | 5'-ACACGCAGCTCATTGTAGAAGG-3'     |
| FBXO46         | NM_001080469.1          | 150                       | 5'-CCTTGCCTCGCTTTTGACA-3'      | 5'-GGA AGG AAA AAC CCA GAA A-3'  |
| GIPR           | NM_000164.3             | 99                        | 5'-TGCCCTTCTGGAGATGACAAC-3'    | 5'-TTCTCGCTTCCCTTCATAACCA-3'     |
| GnRHR          | NM_000406.2             | 102                       | 5'-CACGGGTCCTTCATCAGG-3'       | 5'-GCAAAATGCAACCGTCATTTT-3'      |
| HTR4           | NM_001040169.2          | 81                        | 5'-AGTCGGCAGACCAGCATAGC-3'     | 5'-AAGCAACCATGATGATGCA-3'        |
| LHCGR          | NM_000233.3             | 99                        | 5'-CCCTGGAAAGGATAGAAGCTAATG-3' | 5'-GCTCCGGGCTCAATGTATCTC-3'      |
| MC2R           | NM_000529.2             | 197                       | 5'-GGACCGCTACATCACCATCT-3'     | 5'-AGGCACAGGATGAAGACCAG-3'       |
| QPCTL          | NM_017659.3             | 79                        | 5'-GGATGACAGCCAGAGGAATAAGAA-3' | 5'-GTATTGGTCCCTGCAAACCTTT-3'     |
| SIX5           | NM_175875.4             | 123                       | 5'-CCC GTTACCTTCTGCGTTGT-3'    | 5'-CGTCTGTCTGTGATTCTCCCTTT-3'    |
| SNRPD2         | NM_004597.5             | 99                        | 5'-TCATCAACTGCCGAACAAT-3'      | 5'-TCAGTCCACATCTCCTTCACGTT-3'    |
| ZMYND8         | NM_183047.3             | 120                       | 5'-AGGTCGATGCCCGATTCTTT-3'     | 5'-GCACTGTTGAAGATGCTCTTAGTCTT-3' |

***Primer sequences used for PCR amplification of GIPR promoter after sodium bisulfite treatment***

| <i>Name</i>   | <i>Sense primer</i>             | <i>Antisense primer</i>         |
|---------------|---------------------------------|---------------------------------|
| GIPR Promoter | 5'-TATTTGTGGGTGGGATAGTATGAGA-3' | 5'-CCCCAATCCTACTCCTAATCACTTA-3' |

***Primer sequences used for pyrosequencing of GIPR promoter after sodium bisulfite treatment***

| <i>Name</i>      | <i>Sequence</i>       | <i>Name</i>      | <i>Sequence</i>       |
|------------------|-----------------------|------------------|-----------------------|
| GIPR Promoter #1 | 5'-TATATTTGGTGTAGG-3' | GIPR Promoter #2 | 5'-TTATGATTTTGATGA-3' |
| GIPR Promoter #3 | 5'-TTGTTTTAGAGTTTT-3' | GIPR Promoter #4 | 5'-GTTTTTTTTTATTAT-3' |
